# Supplementary material
Source: publisher figshare collection journal article supplement (https://acs.figshare.com/ndownloader/files/4849720)

# **Characterisation and Modulation of the Bitterness of Polymethoxyflavones using Sensory and Receptor based Methods**

**A. Max Batenburg\*, Teun de Joode and Robin J. Gouka**

Unilever R&D Vlaardingen, PO Box 114, 3130AC Vlaardingen, The Netherlands

\*Corresponding author ([max.batenburg@unilever.com](mailto:max.batenburg@unilever.com); fax: +31 (0)10 4605236; tel  
+31 (0)10 4605644)

**Supporting information**

**Figure S1:** Analysis of the effectiveness of demethoxylation of PMF sample B.

Upper two panels: Shift of HPLC retention time due to demethoxylation. Lower four panels: Confirmation of demethylation in the A-ring by LC-MS<sup>3</sup> and -MS<sup>4</sup>

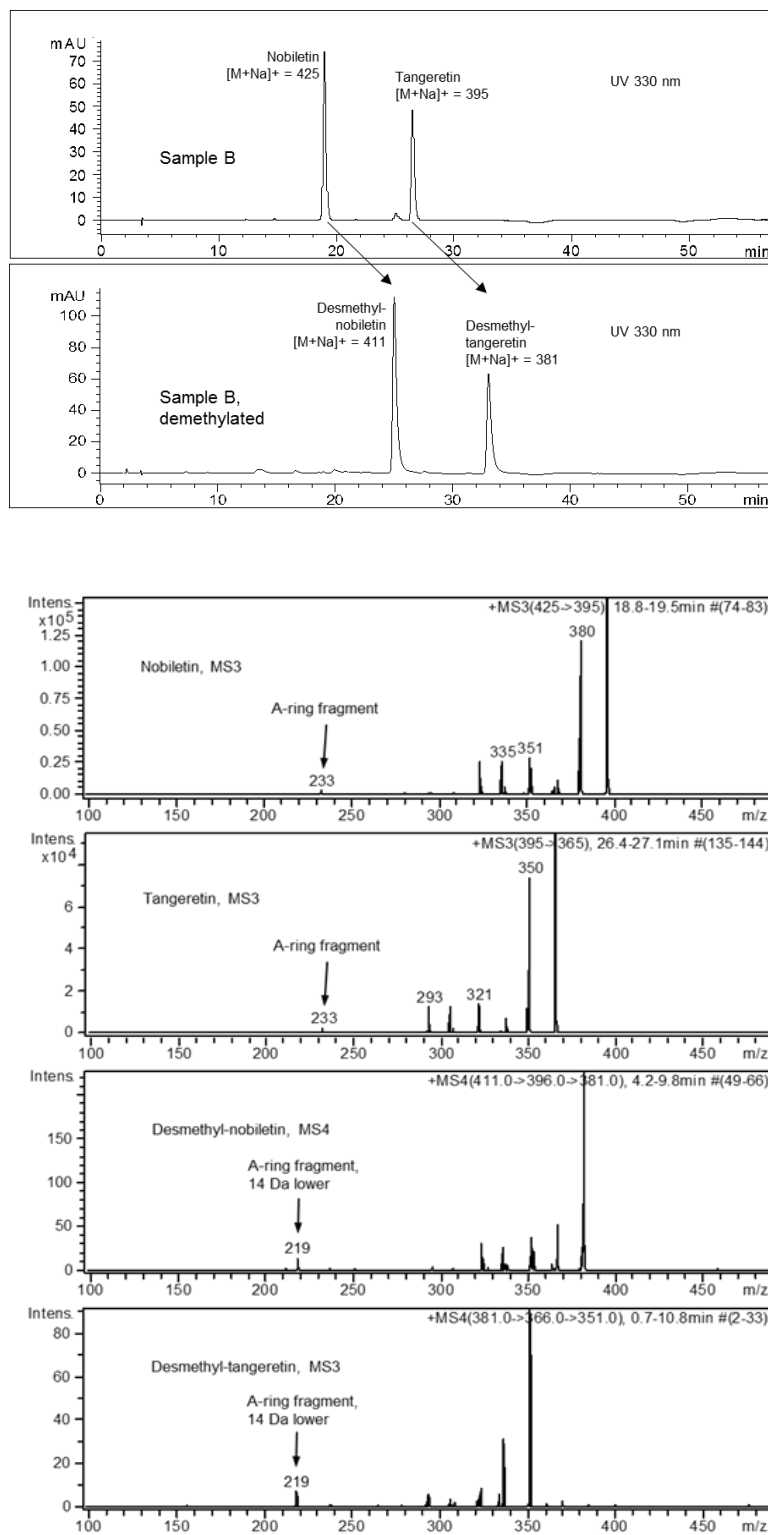

Supplement: Supplementary file 1 [file 4849720]
